# Supplementary material for: Successes, lessons and opportunities: 15-year follow-up of an integrated evidence-based medicine curriculum
Source: HighWire-hosted journal article supplement (doi:10.1136/bmjebm-2020-111393), 2020-12-21
Supplement: bmjebm-2020-111393supp001_data_supplement.pdf [file bmjebm-2020-111393supp001_data_supplement.pdf]

### Additional References

31. Schünemann HJ, Mustafa RA, Brozek J, et al. Grade guidelines: 21 Part 1. study design, risk of bias, and indirectness in rating the certainty across a body of evidence for test accuracy. *J Clin Epidemiol* 2020;122:129–41.
32. Agoritsas T, Heen AF, Brandt L, et al. Decision AIDS that really promote shared decision making: the PACE quickens. *BMJ* 2015;350:g7624.
33. CVD risk calculator – best science medicine course. Available: <http://chd.bestsciencemedicine.com/calc2.html> [Accessed 19 Mar 2020].
34. Peer pain calculator. Available: <https://pain-calculator.com> [Accessed 19 Mar 2020].
35. Mayo clinic shared decision making national resource center. Available: <https://shareddecisions.mayoclinic.org> [Accessed 19 Mar 2020].
36. Bmj rapid recommendations. Available: <https://www.bmj.com/rapidrecommendations> [Accessed 19 Mar 2020].
37. Canadian Task force on preventive health care tools and resources. Available: <https://canadiantaskforce.ca/tools-resources/> [Accessed 19 Mar 2020].
